# Supplementary material for: Population effect model identifies gene expression predictors of survival outcomes in lung adenocarcinoma for both Caucasian and Asian patients
Source: PLoS One. 2017 Apr 20;12(4):e0175850. doi: 10.1371/journal.pone.0175850 (PMC5398559; doi:10.1371/journal.pone.0175850)
Supplement: S1 Table — (XLSX) [file pone.0175850.s006.xlsx]

## Sheet: Sheet1
Gene	beta	lower	upper	p-value	FDR adjusted p-value
FRMD3	-64.9281	-113.502	-16.3542	2.24281e-30	4.00409e-26
GPM6A	-51.514	-51.5173	-51.5108	8.67532e-30	7.26253e-26
RADIL	-6.62488	-10.3409	-2.90889	1.22039e-29	7.26253e-26
GABARAPL1	-12.1055	-18.4353	-5.77572	6.21733e-29	2.77495e-25
LHFPL5	10.374	4.71857	16.0294	1.00266e-28	3.58011e-25
ID4	-34.2974	-60.3833	-8.21159	3.66536e-28	9.34823e-25
RCC1	51.3396	6.69172	95.9875	3.6214e-28	9.34823e-25
FAM136A	57.1367	10.5814	103.692	4.80953e-28	1.07331e-24
IQGAP3	4.71704	2.23989	7.19419	1.24839e-27	2.47639e-24
GRK5	-5.01415	-7.28593	-2.74237	2.20015e-27	3.92793e-24
CAV1	-3.44484	-5.12048	-1.7692	3.26608e-27	5.30084e-24
CHD1L	18.7029	7.95427	29.4515	4.18135e-27	5.74228e-24
RASIP1	-5.43747	-8.25631	-2.61863	4.10788e-27	5.74228e-24
RAI2	-8.44113	-12.7345	-4.14778	4.70018e-27	5.99373e-24
C10orf54	-12.6233	-19.675	-5.5716	5.56103e-27	6.61873e-24
LTBP4	-35.1292	-57.9899	-12.2685	8.73423e-27	9.74577e-24
UBE2T	5.14103	2.65823	7.62382	1.2378e-26	1.29991e-23
PDLIM2	-6.03389	-8.6649	-3.40288	1.44781e-26	1.43599e-23
STX11	-4.10641	-5.92685	-2.28596	1.72346e-26	1.61942e-23
C13orf36	-1.9093	-2.70657	-1.11203	2.06257e-26	1.84115e-23
EFNA4	5.92239	3.13836	8.70642	2.9625e-26	2.51855e-23
CDCA8	4.53934	2.54672	6.53196	3.38488e-26	2.74683e-23
THBD	-4.41069	-6.46136	-2.36002	3.97708e-26	3.08708e-23
RSPO1	-2.92538	-4.25134	-1.59943	4.98092e-26	3.70519e-23
SCUBE1	-3.21595	-4.59344	-1.83845	6.86517e-26	4.90255e-23
ATIC	9.24791	5.13562	13.3602	9.26426e-26	6.12574e-23
CFD	-4.13547	-6.17527	-2.09567	9.1309e-26	6.12574e-23
PTRF	-5.36639	-7.65285	-3.07993	1.09157e-25	6.95995e-23
LATS2	-7.22377	-10.2874	-4.16016	1.34771e-25	8.29678e-23
KANK3	-4.30033	-6.31176	-2.2889	1.68737e-25	9.71761e-23
TIMELESS	7.5799	4.30717	10.8526	1.6808e-25	9.71761e-23
RASAL1	2.8158	1.4944	4.13719	1.82421e-25	1.01774e-22
PYCR1	3.46909	1.89933	5.03885	1.92423e-25	1.04101e-22
ATP10B	2.91705	1.72359	4.11051	2.12038e-25	1.05153e-22
CFL2	-6.50851	-9.15784	-3.85918	2.02066e-25	1.05153e-22
CLEC3B	-2.87569	-4.13857	-1.61282	2.07602e-25	1.05153e-22
BUB1B	4.10939	2.01608	6.2027	2.26716e-25	1.09393e-22
TROAP	3.9962	2.1162	5.87621	3.13262e-25	1.47176e-22
DAP3	15.309	-9.68518	40.3031	3.95326e-25	1.80968e-22
XPO5	11.9743	6.71636	17.2323	4.33571e-25	1.93514e-22
LHFP	-5.22427	-7.55191	-2.89663	6.26482e-25	2.72795e-22
NXPH3	-3.52517	-5.04531	-2.00503	6.53833e-25	2.77926e-22
ADH1B	-3.55884	-5.26569	-1.85198	7.35204e-25	2.95297e-22
SASH1	-4.96977	-7.10777	-2.83178	7.15573e-25	2.95297e-22
UBE2C	3.99366	1.9711	6.01621	7.4432e-25	2.95297e-22
CDC42EP2	-5.77741	-8.42759	-3.12723	7.64396e-25	2.96669e-22
KIF2C	3.99777	2.22174	5.77381	8.36253e-25	3.17652e-22
FUT2	2.31873	1.40612	3.23135	9.12185e-25	3.32352e-22
RAG1AP1	7.28542	4.10722	10.4636	8.99078e-25	3.32352e-22
FHL1	-3.48228	-5.06727	-1.89729	1.19463e-24	4.1819e-22
FOXM1	5.19498	-6.54773	16.9377	1.18153e-24	4.1819e-22
RILPL2	-9.91039	-14.0402	-5.78056	1.54257e-24	5.29606e-22
EZH2	5.34359	3.07768	7.6095	1.62198e-24	5.46364e-22
CCBE1	-2.52616	-3.57863	-1.47369	1.94173e-24	6.41957e-22
INMT	-3.19081	-4.63323	-1.74839	2.45752e-24	7.97712e-22
TOP2A	3.01243	-0.138861	6.16372	2.5026e-24	7.97839e-22
CENPF	3.08448	1.78811	4.38086	2.88627e-24	9.04009e-22
FANCD2	6.54977	3.66587	9.43366	2.94018e-24	9.05018e-22
DENND2A	-4.95876	-6.94732	-2.9702	3.14395e-24	9.43079e-22
PKIG	-6.98906	-10.0421	-3.93598	3.16948e-24	9.43079e-22
ANLN	3.4809	1.82462	5.13718	3.41789e-24	1.00032e-21
CDC20	3.25954	-0.887623	7.40669	3.50549e-24	1.00941e-21
KNTC1	5.20517	3.02861	7.38173	3.78151e-24	1.07161e-21
CCDC85A	-2.83793	-4.10661	-1.56925	4.07958e-24	1.13801e-21
GYPC	-6.90359	-10.2296	-3.57754	4.17703e-24	1.14727e-21
C1orf131	7.86148	4.33856	11.3844	4.3578e-24	1.16119e-21
FAM107A	-2.65136	-3.77559	-1.52714	4.33747e-24	1.16119e-21
PLAC9	-3.46977	-4.95241	-1.98713	4.59602e-24	1.20666e-21
SPP1	1.26749	0.759308	1.77568	4.96944e-24	1.28579e-21
OTUD1	-5.40614	-7.7239	-3.08838	5.10709e-24	1.30253e-21
NFKBIL2	7.03092	3.86844	10.1934	5.2015e-24	1.30792e-21
ANGPTL1	-3.43584	-4.98685	-1.88483	5.40326e-24	1.33978e-21
ARHGAP6	-3.7746	-5.35	-2.1992	6.84682e-24	1.67447e-21
ABCA8	-3.49286	-4.95071	-2.03501	7.32565e-24	1.76736e-21
SRPK1	6.38021	3.67707	9.08336	7.74647e-24	1.84397e-21
TAL1	-3.78361	-5.35654	-2.21068	8.65887e-24	2.03404e-21
CCNB2	3.89136	2.18267	5.60005	9.19786e-24	2.07839e-21
HJURP	2.80263	1.5273	4.07795	9.14312e-24	2.07839e-21
RECQL4	4.3246	2.45673	6.19247	9.31335e-24	2.07839e-21
WASF3	-4.79669	-6.86158	-2.73181	9.06245e-24	2.07839e-21
SPTBN1	-4.61108	-6.55193	-2.67023	9.49172e-24	2.09205e-21
KIF20A	3.59777	1.99487	5.20066	9.62086e-24	2.09465e-21
FLAD1	8.08013	4.66495	11.4953	9.88906e-24	2.1271e-21
KIF18B	3.56581	1.81544	5.31617	1.0114e-23	2.14958e-21
CAV2	-3.28168	-4.74307	-1.82029	1.04605e-23	2.18741e-21
ST6GALNAC6	-7.75701	-11.0556	-4.45838	1.0537e-23	2.18741e-21
C16orf59	2.98439	1.73697	4.2318	1.08659e-23	2.22975e-21
SLC35B1	10.9601	6.30568	15.6146	1.11579e-23	2.26365e-21
SFTPC	-1.68634	-2.38749	-0.985186	1.29697e-23	2.60166e-21
MELK	3.28637	1.81555	4.75719	1.38746e-23	2.75227e-21
CCNB1	5.40941	2.74063	8.0782	1.49051e-23	2.92418e-21
TPX2	3.27088	1.78006	4.7617	1.52424e-23	2.95785e-21
ALDH18A1	5.73143	3.46746	7.99539	1.58093e-23	3.03487e-21
FOXF1	-3.09108	-4.40279	-1.77938	1.81491e-23	3.4107e-21
ORC6L	5.01962	2.91149	7.12774	1.79596e-23	3.4107e-21
UNC5CL	3.84481	2.11621	5.57341	2.02047e-23	3.75744e-21
TBRG4	10.3508	6.16199	14.5397	2.07257e-23	3.8146e-21
STIL	4.10104	2.26591	5.93617	2.34595e-23	4.27371e-21
MYOC	-1.49193	-2.08884	-0.895023	2.38676e-23	4.30412e-21
CDO1	-3.46043	-5.00836	-1.91249	2.42427e-23	4.32805e-21
OCIAD2	3.64033	2.15551	5.12516	2.53602e-23	4.48273e-21
C1orf183	-4.48087	-6.24821	-2.71352	2.78205e-23	4.86941e-21
MTX2	10.352	5.89171	14.8122	3.20936e-23	5.56278e-21
STARD8	-4.6766	-6.66246	-2.69074	3.29692e-23	5.6596e-21
PAICS	6.17275	3.53556	8.80994	3.74651e-23	6.37014e-21
PKHD1L1	-2.50737	-3.50155	-1.51318	4.10951e-23	6.92142e-21
PLK1	4.01062	2.26184	5.75941	4.24515e-23	7.04904e-21
PTPN21	-4.02879	-5.75493	-2.30264	4.26425e-23	7.04904e-21
LDB2	-3.634	-5.10381	-2.16419	4.45106e-23	7.28229e-21
SLIT2	-2.96627	-4.14356	-1.78898	4.48693e-23	7.28229e-21
TMPRSS4	1.12012	0.710444	1.5298	4.74258e-23	7.62786e-21
SDPR	-2.71155	-3.80648	-1.61662	5.48755e-23	8.74725e-21
MKI67	2.9985	1.7008	4.2962	5.91113e-23	9.27862e-21
PLEK2	3.47735	2.05862	4.89608	5.92485e-23	9.27862e-21
LYVE1	-2.45183	-3.44028	-1.46338	6.25773e-23	9.71472e-21
GAS6	-5.63754	-7.9408	-3.33428	6.33026e-23	9.7426e-21
PPAP2B	-4.80301	-6.71109	-2.89494	6.51973e-23	9.94844e-21
ZWINT	3.96737	2.26188	5.67286	6.61496e-23	1.00082e-20
FARSB	12.383	6.77843	17.9876	7.05016e-23	1.0577e-20
ECSCR	-4.17305	-5.8256	-2.5205	7.32669e-23	1.09003e-20
CAD	10.0316	5.56764	14.4955	7.89097e-23	1.16428e-20
PID1	-4.30035	-6.04519	-2.5555	8.35873e-23	1.22318e-20
HSPA12B	-3.19927	-4.46876	-1.92979	8.60349e-23	1.24877e-20
KANK2	-4.64251	-6.57118	-2.71383	9.07087e-23	1.30599e-20
GMPPA	6.8573	4.34311	9.37149	9.80141e-23	1.38369e-20
MAMDC2	-2.97035	-4.23465	-1.70604	9.73947e-23	1.38369e-20
S1PR1	-3.37247	-4.69268	-2.05225	9.84308e-23	1.38369e-20
CCDC48	-2.85863	-4.00739	-1.70988	1.01512e-22	1.40762e-20
KIAA0427	-7.27663	-10.1281	-4.42517	1.0171e-22	1.40762e-20
EPAS1	-2.766	-3.84468	-1.68732	1.05377e-22	1.44715e-20
FANCI	9.50958	5.35829	13.6609	1.11434e-22	1.50751e-20
SPINK1	1.14722	0.682639	1.6118	1.11461e-22	1.50751e-20
GGCT	5.77931	3.44035	8.11826	1.12354e-22	1.50817e-20
STOM	-7.26479	-10.3283	-4.20124	1.15471e-22	1.53844e-20
C9orf140	2.85915	1.71057	4.00772	1.22033e-22	1.61382e-20
KCNB1	-2.35101	-3.26937	-1.43264	1.25284e-22	1.64462e-20
FGD5	-4.02849	-5.64173	-2.41524	1.31567e-22	1.7145e-20
SKA3	3.00221	1.73138	4.27304	1.33683e-22	1.72945e-20
TGFBR3	-3.7372	-5.38505	-2.08934	1.35529e-22	1.74071e-20
FXYD6	-5.63594	-8.14929	-3.1226	1.37569e-22	1.74186e-20
SH3GL3	-1.72925	-2.3244	-1.13409	1.36764e-22	1.74186e-20
BLM	4.65421	2.63841	6.67001	1.44446e-22	1.81606e-20
RCC2	9.1511	5.42322	12.879	1.49922e-22	1.87172e-20
SOX17	-2.68712	-3.7326	-1.64164	1.51609e-22	1.87964e-20
CRIM1	-4.96594	-7.00499	-2.92689	1.59111e-22	1.95904e-20
SPOCK2	-2.48569	-3.38725	-1.58414	1.61809e-22	1.97862e-20
RCCD1	6.71509	4.06557	9.36461	1.70913e-22	2.07572e-20
ROBO4	-3.12148	-4.39386	-1.84909	1.73581e-22	2.08305e-20
ZBTB47	-7.36345	-10.306	-4.42086	1.7385e-22	2.08305e-20
TACC1	-4.86808	-6.78614	-2.95003	1.76515e-22	2.10088e-20
MYBL2	2.25513	1.28166	3.22861	1.85766e-22	2.19634e-20
CNRIP1	-6.77738	-9.64495	-3.90981	1.89523e-22	2.21148e-20
WIF1	-1.93486	-2.7531	-1.11662	1.89347e-22	2.21148e-20
FABP4	-1.56242	-2.12511	-0.999739	1.99927e-22	2.31772e-20
SYT12	1.97816	1.15401	2.8023	2.14032e-22	2.46523e-20
LGI3	-1.48576	-2.06347	-0.908044	2.22766e-22	2.54938e-20
B3GNT3	1.30188	0.820758	1.783	2.38412e-22	2.71106e-20
SGCG	-1.71716	-2.37036	-1.06396	2.47108e-22	2.79217e-20
KIF14	2.49282	1.50354	3.48211	2.50344e-22	2.81093e-20
GTSE1	3.1149	1.803	4.4268	2.54459e-22	2.83929e-20
EDNRB	-2.49915	-3.51531	-1.48299	2.65581e-22	2.94498e-20
COASY	9.15974	5.48885	12.8306	2.81967e-22	3.10739e-20
GRASP	-2.99598	-4.14976	-1.84219	2.9881e-22	3.27279e-20
RECK	-4.13003	-5.78658	-2.47347	3.50917e-22	3.82008e-20
GOLM1	3.66362	2.23085	5.0964	3.56487e-22	3.85718e-20
ETV4	2.20856	1.30093	3.11619	3.6022e-22	3.86468e-20
TMEM177	5.0425	3.04898	7.03602	3.61508e-22	3.86468e-20
ITM2A	-4.10661	-5.82789	-2.38533	3.64415e-22	3.87256e-20
RRM2	2.76298	1.58814	3.93782	3.90334e-22	4.12346e-20
DNAJB4	-5.00824	-7.13683	-2.87964	4.06333e-22	4.26721e-20
ANKS1A	-6.41115	-8.84452	-3.97779	4.19193e-22	4.37652e-20
WISP2	-2.83144	-3.9547	-1.70819	4.30964e-22	4.47325e-20
NAT10	11.3779	6.72827	16.0275	4.61572e-22	4.76326e-20
BIRC5	3.29805	1.76321	4.83289	4.671e-22	4.79261e-20
MMP11	1.48075	0.900267	2.06123	4.77871e-22	4.87511e-20
KIF26B	2.13041	1.32694	2.93387	5.04973e-22	5.12232e-20
CLDN5	-2.49655	-3.46449	-1.52862	5.3844e-22	5.38767e-20
DCN	-3.74668	-5.25679	-2.23657	5.43203e-22	5.38767e-20
EXO1	2.67617	1.5283	3.82405	5.42057e-22	5.38767e-20
TCF21	-2.69208	-3.81623	-1.56794	5.37105e-22	5.38767e-20
PAFAH1B3	4.5938	2.72192	6.46567	5.97134e-22	5.88985e-20
INPP5A	-6.26529	-8.72322	-3.80736	6.17681e-22	6.05904e-20
MSTO1	6.25274	3.77007	8.73542	6.21974e-22	6.06781e-20
HEG1	-3.59249	-4.95088	-2.2341	6.5351e-22	6.34083e-20
SLC5A6	11.0554	6.7399	15.3709	7.06218e-22	6.8152e-20
CBX7	-5.59633	-7.90773	-3.28494	7.10919e-22	6.82368e-20
RAMP2	-2.81235	-3.9105	-1.71421	7.15296e-22	6.82897e-20
CYBRD1	-3.91392	-5.50156	-2.32628	7.44346e-22	7.06852e-20
DKC1	9.09356	5.12367	13.0634	7.51945e-22	7.07128e-20
TBX3	-3.45398	-4.8218	-2.08617	7.52558e-22	7.07128e-20
GSS	9.58879	5.57793	13.5997	7.59642e-22	7.10046e-20
NCAPH	3.218	1.85817	4.57783	8.36666e-22	7.77969e-20
DLGAP5	2.49447	1.43484	3.5541	8.42909e-22	7.79712e-20
CST1	0.910541	0.597908	1.22317	8.97487e-22	8.25919e-20
ACVRL1	-3.1115	-4.29072	-1.93228	9.13687e-22	8.36515e-20
SERPING1	-5.86354	-8.23572	-3.49136	9.56138e-22	8.70915e-20
SFXN4	5.83545	3.71871	7.95218	1.05081e-21	9.52289e-20
NPR1	-2.88087	-4.00781	-1.75393	1.06257e-21	9.5808e-20
NUSAP1	3.58431	2.01923	5.1494	1.1308e-21	1.01448e-19
C12orf11	10.2174	5.73166	14.7031	1.16205e-21	1.03214e-19
CCNF	5.49478	3.03881	7.95075	1.15814e-21	1.03214e-19
HMBS	6.31408	3.86544	8.76271	1.17968e-21	1.04261e-19
POLQ	2.54312	1.53699	3.54924	1.19162e-21	1.04798e-19
JAM2	-3.43064	-4.83795	-2.02333	1.27457e-21	1.10999e-19
PVRL4	2.42614	1.53954	3.31274	1.27347e-21	1.10999e-19
LEPR	-2.73992	-3.81374	-1.66611	1.29854e-21	1.12538e-19
STARD13	-4.38583	-6.17888	-2.59278	1.3346e-21	1.15105e-19
ARRB1	-4.06235	-5.53942	-2.58528	1.36055e-21	1.16542e-19
JPH4	-3.84347	-5.46466	-2.22227	1.36432e-21	1.16542e-19
STX1A	3.27509	1.92795	4.62223	1.41842e-21	1.20586e-19
KL	-2.60012	-3.64514	-1.55509	1.45574e-21	1.23172e-19
GLIPR2	-4.03889	-5.56375	-2.51403	1.52653e-21	1.28553e-19
ADAMTS8	-2.39578	-3.36659	-1.42497	1.5436e-21	1.2938e-19
ITLN2	-1.14404	-1.57265	-0.715431	1.61404e-21	1.34652e-19
PFAS	9.25588	5.41767	13.0941	1.66127e-21	1.37948e-19
C16orf75	3.57255	2.07908	5.06601	1.74248e-21	1.44021e-19
CASKIN2	-3.97895	-5.50397	-2.45394	1.80809e-21	1.48755e-19
AOX1	-2.61978	-3.64668	-1.59289	1.8208e-21	1.49114e-19
TIMP3	-3.23733	-4.49657	-1.97809	1.83176e-21	1.49326e-19
C12orf32	7.17814	4.32954	10.0267	1.91984e-21	1.54529e-19
GPX3	-2.80699	-3.90833	-1.70565	1.92155e-21	1.54529e-19
LAD1	2.63707	1.56826	3.70588	1.92106e-21	1.54529e-19
MTIF2	9.98849	5.89129	14.0857	1.96388e-21	1.57225e-19
SALL4	1.93676	1.20942	2.6641	1.97991e-21	1.57801e-19
ASPM	2.13139	1.29868	2.96411	2.00758e-21	1.59295e-19
NPNT	-3.69684	-5.17658	-2.21711	2.04706e-21	1.61709e-19
PAK1	5.6369	3.62832	7.64547	2.11429e-21	1.66284e-19
ECE2	4.18607	2.45776	5.91439	2.1247e-21	1.6637e-19
AURKB	2.52315	1.46748	3.57883	2.2768e-21	1.77501e-19
CDH5	-3.03442	-4.20632	-1.86253	2.29076e-21	1.77812e-19
CDCA7	1.78657	1.11481	2.45833	2.3731e-21	1.83407e-19
XRCC2	2.86542	1.63111	4.09973	2.48541e-21	1.91258e-19
ADAMTSL3	-2.62344	-3.61588	-1.63099	2.57278e-21	1.97133e-19
EMCN	-2.73678	-3.80169	-1.67187	2.63433e-21	2.00986e-19
ITIH5	-3.26802	-4.64316	-1.89287	2.65988e-21	2.01215e-19
PKMYT1	5.09627	2.85676	7.33578	2.65629e-21	2.01215e-19
NLN	4.60916	2.87915	6.33916	2.7692e-21	2.08601e-19
FMO2	-2.44856	-3.44929	-1.44784	2.93283e-21	2.19999e-19
SRD5A1	5.08419	3.05254	7.11584	3.09375e-21	2.31099e-19
C6orf125	5.64586	3.31156	7.98016	3.24827e-21	2.41631e-19
FAM189A2	-2.69564	-3.73427	-1.65701	3.35275e-21	2.48367e-19
SAMD10	3.64729	2.29373	5.00085	3.63749e-21	2.68348e-19
ASPA	-2.65689	-3.74798	-1.56581	3.84622e-21	2.82579e-19
HLX	-4.63407	-6.52047	-2.74766	4.05545e-21	2.9673e-19
LOC100190938	-2.67127	-3.70964	-1.63291	4.34659e-21	3.16734e-19
RHOJ	-4.20756	-5.8715	-2.54362	4.39128e-21	3.18689e-19
PDIA4	4.54725	2.77571	6.31879	4.49184e-21	3.24668e-19
AGTR1	-2.65121	-3.75416	-1.54826	5.02252e-21	3.6156e-19
UBE2E2	-7.98251	-11.2181	-4.74692	5.21588e-21	3.73972e-19
VAMP2	-9.34724	-13.3245	-5.36994	5.62876e-21	4.01961e-19
IGSF9	1.90508	1.177	2.63315	5.82073e-21	4.12371e-19
SORBS3	-5.59221	-7.79057	-3.39386	5.80423e-21	4.12371e-19
OLFML1	-4.11826	-5.75758	-2.47894	5.86833e-21	4.1247e-19
WDR75	8.56921	5.20065	11.9378	5.86737e-21	4.1247e-19
CYGB	-5.00508	-7.0955	-2.91467	5.9178e-21	4.14316e-19
NUF2	2.67921	1.50823	3.85019	6.11053e-21	4.26138e-19
AOC3	-2.84182	-3.96678	-1.71686	6.20874e-21	4.31302e-19
FAM150B	-1.86539	-2.57479	-1.15598	6.24606e-21	4.32213e-19
ZHX3	-5.59633	-7.75934	-3.43333	6.32647e-21	4.36087e-19
ARHGEF16	3.12806	1.98473	4.2714	6.89348e-21	4.71827e-19
FOXF2	-3.66858	-5.17892	-2.15824	6.89782e-21	4.71827e-19
SPTBN2	2.56066	1.60495	3.51637	6.97652e-21	4.75389e-19
SLC25A13	9.37769	5.52707	13.2283	7.04051e-21	4.77925e-19
DPH2	7.60846	4.77656	10.4404	7.10796e-21	4.80676e-19
KIF1C	-5.3418	-7.22067	-3.46293	7.19742e-21	4.84889e-19
METTL1	4.93201	3.05104	6.81297	7.28618e-21	4.88231e-19
TOM1L2	-7.1299	-9.95605	-4.30374	7.30172e-21	4.88231e-19
C11orf80	5.13376	3.1651	7.10241	7.33263e-21	4.88468e-19
EIF2AK1	10.9728	6.19187	15.7537	7.38752e-21	4.90295e-19
XDH	1.52498	0.930306	2.11965	7.7724e-21	5.13928e-19
CCT3	7.30233	4.17484	10.4298	7.95455e-21	5.24031e-19
AHNAK	-3.19802	-4.36126	-2.03478	8.05081e-21	5.28424e-19
FH	10.676	6.39924	14.9528	8.10541e-21	5.30058e-19
AIFM1	6.79677	4.03576	9.55778	8.1742e-21	5.32606e-19
SLC25A39	8.36599	4.87157	11.8604	8.31698e-21	5.39938e-19
DNAJC18	-5.50779	-7.58936	-3.42622	8.54851e-21	5.50962e-19
KIF4A	2.64203	1.5067	3.77737	8.52084e-21	5.50962e-19
FZD4	-4.03	-5.5962	-2.46381	8.95608e-21	5.75154e-19
ADM2	1.88264	1.19522	2.57005	9.38185e-21	6.00337e-19
UPK3B	-1.42936	-1.96681	-0.891902	9.792e-21	6.24345e-19
C1orf112	6.77509	4.09318	9.45701	1.01204e-20	6.41452e-19
C20orf160	-2.84734	-4.00244	-1.69225	1.02989e-20	6.41452e-19
ERCC6L	3.04105	1.74499	4.33712	1.03118e-20	6.41452e-19
ID3	-3.65815	-5.14357	-2.17274	1.02874e-20	6.41452e-19
PLSCR4	-4.12397	-5.6865	-2.56145	1.01392e-20	6.41452e-19
SIK2	-5.86196	-8.13301	-3.59091	1.02692e-20	6.41452e-19
TTK	2.54196	1.50309	3.58083	1.02791e-20	6.41452e-19
TPPP	-2.76272	-3.81294	-1.7125	1.03686e-20	6.42742e-19
CEP55	2.57565	1.50569	3.64561	1.07457e-20	6.63815e-19
MORC2	8.09123	4.77312	11.4093	1.12089e-20	6.90044e-19
EHD2	-4.82035	-6.67587	-2.96483	1.14967e-20	7.0533e-19
EML1	-3.85666	-5.36212	-2.35121	1.17335e-20	7.17393e-19
NDC80	2.87967	1.63092	4.12842	1.22593e-20	7.46978e-19
CAB39L	-3.57685	-5.05696	-2.09674	1.31447e-20	7.98206e-19
TCEAL7	-3.83668	-5.30134	-2.37203	1.34528e-20	8.14148e-19
ABI3BP	-3.10247	-4.38621	-1.81874	1.3764e-20	8.30166e-19
NCKAP5	-1.69776	-2.29985	-1.09566	1.4057e-20	8.44981e-19
ALG3	6.57714	3.91352	9.24077	1.43125e-20	8.57453e-19
MSRB3	-3.5113	-4.83572	-2.18689	1.55702e-20	9.29681e-19
ADARB1	-3.45149	-4.75093	-2.15205	1.58351e-20	9.42347e-19
