# Supplementary material for: Population effect model identifies gene expression predictors of survival outcomes in lung adenocarcinoma for both Caucasian and Asian patients
Source: PLoS One. 2017 Apr 20;12(4):e0175850. doi: 10.1371/journal.pone.0175850 (PMC5398559; doi:10.1371/journal.pone.0175850)
Supplement: S2 Table — (XLSX) [file pone.0175850.s007.xlsx]

## Sheet: Sheet1
Gene	beta	lower	upper	p-value	FDR adjusted p-value
C13orf36	-63.6274	-99.9675	-27.2874	8.55709e-33	1.86092e-29
CNTN6	-21.0782	-84.0952	41.9388	4.84011e-33	1.86092e-29
FABP4	-24.7249	-49.1596	-0.290169	4.65432e-33	1.86092e-29
PDIA4	93.1583	-51.1434	237.46	9.11124e-33	1.86092e-29
PTPRQ	-79.5769	-94.68	-64.4738	8.44817e-33	1.86092e-29
PYCR1	11.2081	-24.3567	46.7729	5.01091e-33	1.86092e-29
SFXN1	152.644	114.742	190.546	6.33678e-33	1.86092e-29
SGCG	-44.6201	-120.582	31.3422	4.06971e-33	1.86092e-29
SPOCK2	-54.1019	-75.7987	-32.405	5.10786e-33	1.86092e-29
RAMP2	-20.4704	-93.4595	52.5188	1.79503e-32	3.29963e-29
C10orf67	-46.0242	-89.0402	-3.00822	3.24868e-32	3.48498e-29
CAV1	-6.91507	-14.1742	0.344024	3.21322e-32	3.48498e-29
GYPE	-45.3874	-79.8031	-10.9716	3.41256e-32	3.48498e-29
HSPD1	340.003	313.214	366.791	2.45997e-32	3.48498e-29
OTUD1	-23.3905	-93.7125	46.9314	2.45043e-32	3.48498e-29
SFTPC	-78.1988	-96.0179	-60.3796	2.56087e-32	3.48498e-29
TEK	-89.3757	-134.553	-44.1983	3.07219e-32	3.48498e-29
WNT3A	-15.5444	-46.893	15.8042	2.71316e-32	3.48498e-29
ADAMTS8	-33.8062	-75.7809	8.16848	4.40225e-32	4.25906e-29
C20orf20	58.0089	0.00794561	116.01	6.33387e-32	5.54425e-29
GORASP2	166.36	87.024	245.697	6.19517e-32	5.54425e-29
C19orf59	-45.4459	-73.4702	-17.4217	9.07219e-32	7.58023e-29
PPAT	97.4506	97.445	97.4562	1.21129e-31	9.68085e-29
NECAB1	-6.3774	-21.2537	8.49893	1.37871e-31	9.74749e-29
PAICS	14.3708	-8.33724	37.0789	1.34733e-31	9.74749e-29
RCC1	95.2467	95.2395	95.2539	1.35404e-31	9.74749e-29
PTPN21	-104.421	-228.21	19.3673	1.62135e-31	1.10384e-28
GRIA1	-51.8649	-95.1876	-8.54223	1.80768e-31	1.18675e-28
LRRC36	-82.4552	-125.624	-39.2869	1.93789e-31	1.22835e-28
INMT	-6.34099	-11.6938	-0.988219	2.25876e-31	1.38401e-28
SRPK1	56.2293	-0.618538	113.077	2.34223e-31	1.38887e-28
RTKN2	-3.21409	-5.22911	-1.19907	2.76817e-31	1.59014e-28
CAT	-76.0132	-157.707	5.68024	3.72284e-31	1.95524e-28
CLEC3B	-3.8279	-6.45915	-1.19665	3.71312e-31	1.95524e-28
PHKA1	62.7504	-4.76027	130.261	3.69193e-31	1.95524e-28
C13orf15	-43.6425	-62.7776	-24.5075	4.15881e-31	2.02543e-28
EPAS1	-70.1461	-287.361	147.068	4.29723e-31	2.02543e-28
FAM83A	2.44472	0.917424	3.97202	3.98725e-31	2.02543e-28
PECAM1	-6.35468	-9.83261	-2.87674	4.24529e-31	2.02543e-28
FHL1	-4.48046	-7.43938	-1.52155	4.794e-31	2.20308e-28
RS1	-3.41262	-5.66255	-1.16268	5.99788e-31	2.6891e-28
FAM189A2	-21.9099	-75.258	31.4381	6.30579e-31	2.75983e-28
C9orf140	5.10589	1.96224	8.24954	6.79648e-31	2.90542e-28
GPD1	-3.11581	-5.26898	-0.962632	7.11951e-31	2.97434e-28
ACTN2	-49.394	-82.4514	-16.3366	7.60884e-31	3.04056e-28
ATIC	73.6131	13.7642	133.462	7.53698e-31	3.04056e-28
SLC35B1	115.576	40.6244	190.528	1.22482e-30	4.79035e-28
SCUBE1	-3.15891	-4.88942	-1.4284	1.31605e-30	5.03991e-28
GALNT7	92.3755	4.42943	180.322	1.41719e-30	5.31648e-28
WWC2	-6.85772	-11.2248	-2.49061	1.46438e-30	5.38363e-28
CAV2	-27.4525	-56.4335	1.52846	1.53109e-30	5.51853e-28
ACADL	-4.57692	-8.06064	-1.09321	1.57287e-30	5.5601e-28
TMEM184A	53.6219	4.26979	102.974	1.71507e-30	5.9484e-28
LGI3	-2.76097	-4.32142	-1.20052	1.91768e-30	6.52794e-28
JPH4	-4.92138	-7.6733	-2.16946	2.0113e-30	6.72213e-28
DPEP2	-6.53132	-10.6432	-2.41945	2.07515e-30	6.81169e-28
UPK3B	-16.1837	-33.2133	0.845883	2.19739e-30	7.0864e-28
ANGPT4	-3.98609	-6.46607	-1.5061	2.70242e-30	8.56482e-28
GOLM1	20.8453	20.8407	20.8499	2.87181e-30	8.94738e-28
FMO2	-32.1542	-55.9039	-8.4045	2.95469e-30	9.0522e-28
TGM1	-4.66707	-7.78962	-1.54452	3.22675e-30	9.72361e-28
ETV4	4.5539	1.36342	7.74439	3.28138e-30	9.72877e-28
EDNRB	-4.38539	-7.22564	-1.54515	3.61709e-30	1.05539e-27
SDPR	-7.09464	-17.1009	2.91159	3.93726e-30	1.13086e-27
CCT3	11.3378	4.89476	17.7808	4.64163e-30	1.31265e-27
CA4	-15.4372	-29.5202	-1.35418	5.74783e-30	1.57697e-27
NCKAP5	-4.16178	-7.30143	-1.02212	5.73557e-30	1.57697e-27
EARS2	21.9	8.66178	35.1383	6.42112e-30	1.73578e-27
TAL1	-5.1737	-8.25242	-2.09499	7.01798e-30	1.86963e-27
BTNL9	-48.7411	-48.7459	-48.7363	7.22504e-30	1.88439e-27
C16orf88	12.7368	4.90503	20.5685	7.39456e-30	1.88439e-27
OCIAD2	102.213	81.9687	122.456	7.32927e-30	1.88439e-27
RAMP3	-39.8108	-71.4063	-8.2152	7.48344e-30	1.88439e-27
ST6GALNAC6	-56.8918	-97.3649	-16.4186	8.36506e-30	2.07793e-27
JAM2	-5.78558	-9.19313	-2.37803	1.0118e-29	2.47986e-27
EIF2AK1	20.4269	6.29368	34.5601	1.09095e-29	2.6044e-27
SH3GL3	-2.48467	-3.73745	-1.23189	1.08171e-29	2.6044e-27
STXBP6	-16.14	-35.4556	3.17562	1.17876e-29	2.77794e-27
PAK1	113.199	57.5512	168.848	1.2253e-29	2.85108e-27
ARHGAP6	-38.2751	-69.7873	-6.76298	1.34903e-29	3.09974e-27
GIMAP8	-9.11728	-15.2526	-2.98199	1.46113e-29	3.31586e-27
SLC19A3	-3.38752	-5.1873	-1.58774	1.80723e-29	4.05129e-27
P4HB	11.4178	5.14114	17.6945	1.8769e-29	4.15676e-27
C2orf29	70.7283	-2.71247	144.169	1.99645e-29	4.3689e-27
KL	-4.16156	-6.39792	-1.9252	2.20953e-29	4.7783e-27
C10orf116	-4.38714	-6.859	-1.91529	2.38697e-29	5.10202e-27
NLN	64.8641	16.3419	113.386	2.43279e-29	5.14017e-27
PAFAH1B3	64.8116	-145.762	275.385	2.72364e-29	5.68932e-27
KCNT2	-4.09762	-6.2335	-1.96173	2.84278e-29	5.87147e-27
ARHGEF15	-22.7924	-43.1397	-2.44509	2.94193e-29	6.00873e-27
FIGF	-3.52835	-5.68634	-1.37037	3.12944e-29	6.32147e-27
C1orf112	10.666	4.26804	17.0639	3.36934e-29	6.7321e-27
CSTF2	10.9944	5.09405	16.8948	3.92541e-29	7.7588e-27
CCDC48	-3.89282	-5.90682	-1.87882	4.31828e-29	8.35565e-27
SH2D3C	-6.05109	-9.44676	-2.65541	4.28035e-29	8.35565e-27
MRPL3	189.916	176.326	203.506	4.61376e-29	8.83438e-27
SLC25A39	10.8448	4.91608	16.7735	5.16326e-29	9.78464e-27
GINS1	32.0062	2.66641	61.3461	5.42345e-29	1.01728e-26
C16orf59	22.3138	2.61146	42.0162	5.80379e-29	1.06685e-26
STX1A	6.13746	2.34268	9.93225	5.7786e-29	1.06685e-26
WDR12	10.837	4.6282	17.0459	7.1474e-29	1.30083e-26
GPM6A	-1.86126	-2.66178	-1.06073	8.39577e-29	1.51305e-26
PALM2-AKAP2	-5.98807	-9.15137	-2.82477	8.65722e-29	1.54502e-26
UTP14A	18.7635	7.14621	30.3808	9.33668e-29	1.65026e-26
FAM46B	-4.5158	-6.92414	-2.10747	9.86966e-29	1.72785e-26
HSPA12B	-4.42887	-6.65068	-2.20706	1.02099e-28	1.77055e-26
TUBB3	2.76507	1.26751	4.26264	1.0309e-28	1.77104e-26
FERMT1	3.39363	1.69114	5.09611	1.05631e-28	1.79789e-26
UBE2T	3.29229	1.69954	4.88504	1.08958e-28	1.83749e-26
PRKCE	-45.4355	-81.0604	-9.81063	1.1808e-28	1.97322e-26
MSTO1	72.1927	23.0258	121.36	1.19321e-28	1.976e-26
ADPRH	-9.03058	-13.6574	-4.40377	1.24135e-28	2.03736e-26
LSM12	19.5434	7.79188	31.2949	1.25374e-28	2.0395e-26
IGSF9	2.65728	1.47097	3.8436	1.30144e-28	2.09852e-26
EFNA3	6.21523	2.18482	10.2456	1.33373e-28	2.13187e-26
TOP2A	3.00291	1.56398	4.44184	1.3534e-28	2.14468e-26
AQP4	-3.48047	-5.42636	-1.53458	1.5533e-28	2.44041e-26
NME1	4.83151	2.49002	7.173	1.57549e-28	2.4543e-26
ARHGAP31	-5.24281	-7.65915	-2.82646	1.68816e-28	2.60772e-26
GPT2	4.11894	2.09772	6.14016	1.75337e-28	2.68588e-26
PDCD2L	39.1795	-27.4572	105.816	1.87615e-28	2.8502e-26
DKC1	11.7177	5.62398	17.8113	1.93185e-28	2.91076e-26
TMEM88	-4.45426	-6.60682	-2.30171	1.99887e-28	2.98726e-26
ALG8	13.1833	6.70837	19.6583	2.20477e-28	3.26839e-26
TRAP1	10.4175	5.22189	15.6132	2.35151e-28	3.45804e-26
SHMT2	9.09125	4.69145	13.4911	2.47219e-28	3.59366e-26
ST14	8.10832	3.97642	12.2402	2.48284e-28	3.59366e-26
SERINC2	6.58248	3.13554	10.0294	2.56706e-28	3.68655e-26
E2F8	3.44659	1.60345	5.28972	2.65533e-28	3.78374e-26
CCDC85A	-3.32634	-4.91282	-1.73987	2.99461e-28	4.23438e-26
TFB2M	9.39605	4.73618	14.0559	3.21106e-28	4.50578e-26
DENND3	-5.50179	-8.44663	-2.55695	3.41431e-28	4.71894e-26
MANF	7.89385	4.14573	11.642	3.39502e-28	4.71894e-26
AOC3	-5.31037	-8.14732	-2.47341	3.58102e-28	4.91241e-26
CDC6	3.56605	1.74694	5.38517	3.84861e-28	5.24038e-26
CPB2	-16.7274	-38.8582	5.40329	4.15178e-28	5.61162e-26
OLR1	-4.68978	-6.98888	-2.39067	4.3798e-28	5.8766e-26
EMCN	-5.99766	-14.4061	2.41078	4.57877e-28	6.05518e-26
SGEF	-3.45151	-5.06182	-1.84121	4.55665e-28	6.05518e-26
CD300LG	-19.7254	-39.7698	0.318958	5.03459e-28	6.61042e-26
FLAD1	11.5241	4.79642	18.2518	5.24739e-28	6.84095e-26
SLC6A13	-3.43168	-4.79755	-2.06581	5.87621e-28	7.5536e-26
VEPH1	-3.57816	-5.38646	-1.76986	5.87241e-28	7.5536e-26
CD36	-2.99353	-4.29822	-1.68885	6.06916e-28	7.74745e-26
TFR2	4.60518	2.32088	6.88948	6.19555e-28	7.85425e-26
GPIHBP1	-2.67232	-3.91825	-1.42638	6.38074e-28	7.87345e-26
OVCH1	-16.2591	-36.2706	3.75246	6.26712e-28	7.87345e-26
SLC6A4	-1.19971	-1.71619	-0.683227	6.38203e-28	7.87345e-26
TCF21	-2.84576	-4.11973	-1.57178	6.35737e-28	7.87345e-26
NSF	11.5558	5.71037	17.4013	6.46748e-28	7.92568e-26
LDB2	-4.11068	-6.04386	-2.17751	6.79136e-28	8.26747e-26
HIGD1B	-3.83394	-5.63823	-2.02966	7.09218e-28	8.57688e-26
SSR1	18.5643	9.40577	27.7229	7.39068e-28	8.87945e-26
RECQL4	27.2695	-25.9088	80.4478	8.00413e-28	9.55402e-26
CD5L	-2.78971	-4.1043	-1.47513	8.60493e-28	1.02049e-25
KIF4A	2.46681	1.32	3.61362	9.10761e-28	1.07318e-25
RSPO1	-3.13766	-4.86144	-1.41388	9.25329e-28	1.0834e-25
C20orf160	-3.7459	-5.41843	-2.07336	9.72582e-28	1.13152e-25
STARD13	-6.12454	-9.10188	-3.14719	9.80662e-28	1.13374e-25
FAM150B	-2.73168	-4.05757	-1.40578	1.07354e-27	1.23336e-25
CCT5	9.41436	4.78971	14.039	1.10571e-27	1.26243e-25
CALCOCO1	-7.19742	-10.3861	-4.0087	1.1551e-27	1.31069e-25
GDF10	-2.7974	-4.27743	-1.31738	1.21941e-27	1.37517e-25
TNS1	-4.99563	-7.44956	-2.54171	1.26271e-27	1.41531e-25
SH2D4B	-4.55734	-6.38675	-2.72792	1.45163e-27	1.6172e-25
S1PR1	-4.18438	-8.88776	0.518996	1.51064e-27	1.6728e-25
PSAT1	3.04673	1.56393	4.52953	1.5347e-27	1.68927e-25
GALNTL4	-7.7642	-11.8746	-3.65381	1.64741e-27	1.80254e-25
LAMP3	-3.24256	-4.74658	-1.73854	1.81394e-27	1.97301e-25
SERINC1	-14.1097	-21.4378	-6.7817	1.82536e-27	1.97376e-25
ZNF643	6.51843	3.23837	9.7985	1.85843e-27	1.99775e-25
C20orf202	-3.67908	-5.27084	-2.08733	1.87967e-27	2.0017e-25
USHBP1	-3.41058	-4.85635	-1.96482	1.88388e-27	2.0017e-25
CRTAC1	-3.8642	-5.89407	-1.83432	1.91496e-27	2.02304e-25
PDLIM2	-5.90797	-8.84658	-2.96936	1.98263e-27	2.08256e-25
CDCA8	3.20994	1.73779	4.68209	2.01172e-27	2.10111e-25
LOC100131726	5.51535	2.48832	8.54239	2.04527e-27	2.12407e-25
CENPF	3.57196	1.74131	5.40261	2.15423e-27	2.22466e-25
ABCA8	-3.0189	-4.47277	-1.56504	2.2686e-27	2.32969e-25
PLA2G1B	-3.09095	-4.7576	-1.4243	2.3592e-27	2.40926e-25
RILPL2	-9.74603	-14.5768	-4.91529	2.47277e-27	2.5113e-25
WDR46	11.4189	6.05141	16.7864	2.5388e-27	2.56419e-25
FAM136A	10.8609	5.57047	16.1514	2.58667e-27	2.59826e-25
RUSC1	11.5293	5.83615	17.2225	2.61608e-27	2.61352e-25
ERCC6L	3.2206	1.72954	4.71165	2.65698e-27	2.64004e-25
FAM82A2	-9.7202	-13.8818	-5.5586	2.69443e-27	2.66285e-25
KIF20A	2.62453	1.36555	3.88351	2.77682e-27	2.7296e-25
CCNB1	3.37219	1.85313	4.89125	2.80363e-27	2.7413e-25
FGD5	-4.69419	-6.74073	-2.64765	2.87508e-27	2.79628e-25
C1orf170	4.36429	2.2346	6.49399	3.12813e-27	3.02639e-25
CDC20	2.42934	1.33077	3.5279	3.23433e-27	3.11275e-25
GLIPR2	-5.45859	-7.99878	-2.91841	3.269e-27	3.12973e-25
ADH1B	-2.69895	-3.90161	-1.49628	3.45245e-27	3.27636e-25
SLC39A8	-3.49591	-4.97294	-2.01888	3.45781e-27	3.27636e-25
RPL13AP17	-2.02949	-2.98771	-1.07128	3.76234e-27	3.54663e-25
ANLN	2.69721	1.40127	3.99314	3.86374e-27	3.60524e-25
RRAS	-42.9962	-106.963	20.9711	3.85137e-27	3.60524e-25
KIF11	3.58572	1.93662	5.23481	4.11146e-27	3.81702e-25
PRX	-2.72733	-3.96637	-1.4883	4.19805e-27	3.87782e-25
ACVRL1	-3.82207	-5.46161	-2.18253	4.34072e-27	3.98956e-25
ECE2	5.08427	2.74205	7.42648	4.38441e-27	4.00966e-25
DEPDC1	2.62446	1.43701	3.81191	4.43432e-27	4.01535e-25
PLEKHN1	2.68406	1.49384	3.87427	4.42645e-27	4.01535e-25
RASAL1	2.17856	1.2535	3.10363	4.46403e-27	4.02244e-25
MS4A7	-4.70289	-6.91141	-2.49436	4.54966e-27	4.0796e-25
UHRF1	2.87563	1.47299	4.27827	4.66661e-27	4.16415e-25
MGAT3	-2.41944	-3.50109	-1.33779	4.92254e-27	4.37131e-25
KAL1	-3.57614	-5.20685	-1.94543	4.97387e-27	4.37462e-25
ZWINT	4.04702	2.16128	5.93276	4.95598e-27	4.37462e-25
LGR4	3.44919	1.90451	4.99387	5.53117e-27	4.84162e-25
EXO1	2.66831	1.43316	3.90346	5.6392e-27	4.91278e-25
FAM107A	-2.10283	-4.68946	0.483797	5.69693e-27	4.93967e-25
CDC25C	2.24468	1.30264	3.18672	6.00649e-27	5.18363e-25
NOL11	12.7964	6.67908	18.9137	6.03809e-27	5.18655e-25
UBFD1	10.4622	5.63	15.2945	6.06691e-27	5.18707e-25
SPAG5	3.3012	1.72914	4.87325	6.12174e-27	5.20972e-25
GCOM1	-2.58955	-3.68173	-1.49738	6.30244e-27	5.33878e-25
HTR3C	-5.27104	-8.78622	-1.75586	6.63249e-27	5.56705e-25
SYT15	-2.78297	-4.02427	-1.54168	6.61541e-27	5.56705e-25
IQGAP3	2.21153	1.27913	3.14394	6.69171e-27	5.59123e-25
LOC723809	-3.17099	-4.71521	-1.62677	6.74226e-27	5.60798e-25
C8orf84	-3.03321	-4.3732	-1.69323	7.07908e-27	5.8616e-25
CLDN18	-1.90215	-2.88021	-0.924081	7.46075e-27	6.14993e-25
GPA33	-2.45322	-3.54827	-1.35816	7.78166e-27	6.38582e-25
DNAJA3	14.1008	7.51281	20.6888	8.10224e-27	6.61935e-25
HSPB8	-4.411	-6.36517	-2.45683	8.23826e-27	6.7007e-25
LOC158376	-3.28754	-4.62608	-1.94899	8.41378e-27	6.81331e-25
ECSCR	-4.01514	-5.71571	-2.31456	8.64211e-27	6.96751e-25
FAM189A1	-3.88933	-5.81609	-1.96258	8.7624e-27	7.03364e-25
C1orf74	7.09476	3.56463	10.6249	8.84682e-27	7.07053e-25
SCN4B	-3.17845	-4.56078	-1.79612	9.12509e-27	7.26136e-25
DEPDC1B	2.59778	1.44981	3.74575	9.33082e-27	7.39001e-25
SKA3	2.90122	1.57388	4.22855	9.36717e-27	7.39001e-25
PKNOX2	-3.73483	-5.3871	-2.08256	9.44389e-27	7.4187e-25
PPP1R14B	4.16765	2.4145	5.92079	1.01265e-26	7.92111e-25
NARF	9.46671	4.78271	14.1507	1.02978e-26	7.99626e-25
TRHDE	-2.29784	-3.24109	-1.35459	1.03096e-26	7.99626e-25
GART	11.0012	5.59931	16.403	1.0519e-26	8.12439e-25
SUSD2	-3.99166	-5.98707	-1.99625	1.11552e-26	8.57967e-25
C10orf54	-7.96835	-11.6101	-4.32664	1.12806e-26	8.63212e-25
NUF2	2.20185	1.24545	3.15825	1.13173e-26	8.63212e-25
CCT6A	12.3645	6.19189	18.5372	1.14433e-26	8.69217e-25
BUB1B	2.51769	1.35411	3.68127	1.18499e-26	8.96401e-25
OBFC2B	10.6755	5.26867	16.0824	1.27911e-26	9.63631e-25
SLC39A11	7.44343	3.96239	10.9245	1.39124e-26	1.04383e-24
CDH5	-4.03295	-5.83637	-2.22952	1.55015e-26	1.15832e-24
CANT1	10.097	5.00718	15.1867	1.70079e-26	1.26574e-24
RASIP1	-3.79245	-5.4613	-2.12361	1.71853e-26	1.27379e-24
CALCRL	-3.67307	-5.32682	-2.01932	1.86231e-26	1.37482e-24
PLA2G4F	-2.79676	-4.14355	-1.44996	1.88606e-26	1.38678e-24
MASP1	-2.73693	-3.93194	-1.54191	1.95118e-26	1.41554e-24
NEK2	2.61435	1.3584	3.8703	1.93307e-26	1.41554e-24
NPR1	-2.95885	-4.23508	-1.68261	1.95549e-26	1.41554e-24
SGPL1	7.77265	4.42954	11.1158	1.95597e-26	1.41554e-24
MCM4	5.41389	2.85534	7.97243	1.96505e-26	1.41653e-24
TMEM177	5.86359	3.3018	8.42539	2.00968e-26	1.44304e-24
KIF14	2.83193	1.51416	4.1497	2.02344e-26	1.44727e-24
C9orf100	4.56574	2.47276	6.65872	2.03501e-26	1.44889e-24
DAPK2	-3.51808	-5.09578	-1.94038	2.04147e-26	1.44889e-24
EPCAM	6.40956	3.51608	9.30304	2.23237e-26	1.57828e-24
HMGA1	4.07752	2.40533	5.74971	2.29066e-26	1.60187e-24
PLEK2	3.59821	1.92731	5.2691	2.29066e-26	1.60187e-24
PLK1	2.4106	1.39598	3.42523	2.29188e-26	1.60187e-24
PEBP4	-2.2044	-3.20145	-1.20735	2.3449e-26	1.63272e-24
DLGAP5	2.04316	1.17115	2.91517	2.38498e-26	1.64832e-24
ROBO4	-3.19971	-4.4599	-1.93953	2.38523e-26	1.64832e-24
CDCA3	2.89304	1.58827	4.19781	2.42029e-26	1.66628e-24
CHPF2	8.75371	4.77267	12.7348	2.43092e-26	1.66736e-24
B3GNT3	1.92047	1.11206	2.72887	2.45935e-26	1.68059e-24
KIF2C	2.20245	1.25204	3.15287	2.52636e-26	1.71364e-24
SFXN4	8.58415	4.16624	13.0021	2.51919e-26	1.71364e-24
FBXO32	4.13169	2.32117	5.9422	2.61716e-26	1.7687e-24
PRAM1	-4.15092	-6.13643	-2.16541	2.76829e-26	1.86398e-24
GINS2	3.19315	1.74417	4.64213	2.84058e-26	1.90568e-24
IRAK1	6.59489	3.84742	9.34237	2.87591e-26	1.92236e-24
C12orf32	11.5505	-1.85163	24.9527	2.94302e-26	1.96009e-24
HJURP	2.40805	1.37037	3.44572	3.03917e-26	2.01682e-24
XDH	2.17227	1.24969	3.09485	3.05399e-26	2.01937e-24
CDC45	2.50015	1.37241	3.62788	3.13702e-26	2.06367e-24
SLC35B2	10.0936	5.46188	14.7253	3.14344e-26	2.06367e-24
FHL5	-3.16465	-4.59406	-1.73523	3.17647e-26	2.07056e-24
SLC25A10	4.51211	2.60556	6.41866	3.17031e-26	2.07056e-24
MDK	20.8662	20.8534	20.879	3.31251e-26	2.15161e-24
SLC2A1	2.79757	1.477	4.11814	3.39183e-26	2.19537e-24
C16orf75	4.60146	2.26584	6.93707	3.48378e-26	2.24698e-24
CLDN5	-3.22138	-4.56654	-1.87621	3.52253e-26	2.26403e-24
LPL	-2.70742	-3.87289	-1.54194	3.54218e-26	2.26872e-24
DCAF13	7.33662	4.18266	10.4906	3.57339e-26	2.27288e-24
NEIL3	3.09171	1.6881	4.49532	3.56535e-26	2.27288e-24
DUOX1	-2.51642	-3.55468	-1.47815	3.58852e-26	2.27463e-24
GRASP	-20.9864	-20.9929	-20.9798	3.68694e-26	2.32898e-24
CGNL1	-3.1004	-4.30314	-1.89765	3.92686e-26	2.47204e-24
C1orf131	10.6008	5.89252	15.3091	4.05038e-26	2.54109e-24
STT3A	10.2415	5.69807	14.7848	4.18066e-26	2.61391e-24
TPX2	2.39989	1.3541	3.44568	4.25073e-26	2.64871e-24
CHAF1B	4.8545	2.61101	7.09799	4.2949e-26	2.66102e-24
GARS	8.90392	4.79825	13.0096	4.29944e-26	2.66102e-24
MEX3A	2.56552	1.363	3.76804	4.44427e-26	2.74143e-24
GPR89A	12.316	6.61052	18.0214	4.46301e-26	2.74378e-24
TACC1	-5.25514	-7.52033	-2.98995	4.53978e-26	2.78168e-24
