# Supplementary material for: Population effect model identifies gene expression predictors of survival outcomes in lung adenocarcinoma for both Caucasian and Asian patients
Source: PLoS One. 2017 Apr 20;12(4):e0175850. doi: 10.1371/journal.pone.0175850 (PMC5398559; doi:10.1371/journal.pone.0175850)
Supplement: S3 Table — (XLSX) [file pone.0175850.s008.xlsx]

## Sheet: Sheet1
Gene	beta	lower	upper	p-value	FDR adjusted p-value
RCC1	53.6236	53.6178	53.6295	9.08128e-58	1.69675e-53
CAV1	-3.73816	-5.18276	-2.29356	8.11351e-57	7.57964e-53
GRK5	-5.82063	-8.11885	-3.52241	1.34622e-56	8.38429e-53
STX11	-4.70362	-6.45359	-2.95364	2.45402e-56	1.14627e-52
C13orf36	-2.00011	-2.66701	-1.33322	4.26353e-56	1.5932e-52
PYCR1	3.76077	2.31279	5.20875	7.00567e-55	2.18156e-51
GPM6A	-2.23545	-2.95997	-1.51092	1.31968e-54	3.52241e-51
KANK3	-4.88985	-4.90766	-4.87203	2.55373e-54	5.96424e-51
SCUBE1	-3.1431	-4.2131	-2.0731	8.28031e-54	1.71899e-50
OTUD1	-6.8553	-9.2839	-4.4267	2.14768e-53	4.01273e-50
CLEC3B	-3.05665	-4.13124	-1.98206	4.71363e-53	8.00631e-50
FHL1	-3.69321	-5.03213	-2.35429	1.23801e-52	1.79149e-49
INMT	-3.63781	-4.98249	-2.29314	1.24649e-52	1.79149e-49
ALDH18A1	6.80375	4.54624	9.06126	1.66343e-52	2.21997e-49
SRPK1	6.94956	4.67952	9.21961	2.23673e-52	2.78608e-49
UBE2T	4.05909	2.63317	5.485	2.87789e-52	3.36065e-49
ATIC	9.37261	6.11095	12.6343	4.10795e-52	4.51487e-49
FABP4	-1.82384	-2.36369	-1.28398	4.80069e-52	4.98312e-49
SPOCK2	-3.00024	-3.88552	-2.11497	6.19511e-52	6.09207e-49
FAM136A	10.0451	6.63133	13.4588	1.00288e-51	9.36893e-49
IQGAP3	3.00717	1.99085	4.02349	1.19243e-51	1.06092e-48
ITLN2	-1.46215	-1.9041	-1.02019	1.73908e-51	1.47696e-48
C10orf54	-9.48712	-12.8018	-6.17241	1.94761e-51	1.58214e-48
PAICS	6.94066	4.52108	9.36024	2.89256e-51	2.25185e-48
SFTPC	-2.00863	-2.73227	-1.285	4.77449e-51	3.56826e-48
PTPN21	-4.91429	-6.64324	-3.18533	7.29478e-51	5.24214e-48
CCDC85A	-3.0422	-4.02101	-2.06339	1.44385e-50	9.99144e-48
RSPO1	-2.90878	-3.91331	-1.90425	1.76804e-50	1.1391e-47
TOP2A	2.95644	1.9678	3.94508	1.71587e-50	1.1391e-47
RAMP2	-3.4677	-4.49794	-2.43746	1.88134e-50	1.1717e-47
ADRB2	-3.4915	-4.5543	-2.42869	2.03176e-50	1.22456e-47
CDCA8	3.78608	2.56294	5.00923	2.52307e-50	1.46348e-47
PDLIM2	-5.80984	-7.71573	-3.90394	2.74147e-50	1.46348e-47
SGCG	-2.22288	-2.90269	-1.54307	2.70143e-50	1.46348e-47
SH3GL3	-1.94875	-2.46907	-1.42842	2.71956e-50	1.46348e-47
RASIP1	-4.26137	-5.68207	-2.84067	3.19936e-50	1.66047e-47
EPAS1	-3.57823	-4.67955	-2.47691	3.63237e-50	1.83425e-47
JPH4	-4.202	-5.58034	-2.82366	3.85173e-50	1.89383e-47
C9orf140	3.35848	2.29135	4.42562	4.55949e-50	2.13823e-47
RASAL1	2.36917	1.62056	3.11778	4.57767e-50	2.13823e-47
SDPR	-3.21213	-4.26168	-2.16257	6.44169e-50	2.93552e-47
BUB1B	3.13768	2.05623	4.21913	7.49891e-50	3.18431e-47
CAV2	-3.99789	-5.34786	-2.64792	7.41025e-50	3.18431e-47
LGI3	-1.79882	-2.34586	-1.25178	7.34424e-50	3.18431e-47
RADIL	-3.63502	-4.77623	-2.4938	8.8363e-50	3.66883e-47
TAL1	-4.08756	-5.43945	-2.73568	1.03133e-49	4.18897e-47
EDNRB	-2.85454	-3.77508	-1.93401	1.67538e-49	6.66016e-47
ETV4	2.62955	1.77522	3.48388	1.86792e-49	7.27089e-47
C16orf59	2.8431	1.97155	3.71464	1.97874e-49	7.54507e-47
SLC35B1	12.4669	8.43763	16.4962	2.97493e-49	1.11167e-46
CENPF	3.23266	2.18771	4.2776	3.45656e-49	1.26632e-46
TNNC1	-2.19721	-2.86872	-1.5257	3.54259e-49	1.27288e-46
FAM107A	-2.3571	-3.09259	-1.6216	4.60074e-49	1.62189e-46
ADAMTS8	-2.90462	-3.85196	-1.95729	5.02042e-49	1.72207e-46
GOLM1	3.91058	2.70153	5.11962	5.06924e-49	1.72207e-46
LIMS2	-3.44298	-4.47574	-2.41023	5.54418e-49	1.84978e-46
EMP2	-3.18446	-4.10705	-2.26187	6.155e-49	2.01755e-46
FAM189A2	-2.993	-3.91317	-2.07283	6.3371e-49	2.04142e-46
KIF20A	3.09935	2.05895	4.13975	6.53725e-49	2.0702e-46
RILPL2	-9.48824	-12.5735	-6.40295	6.90158e-49	2.14915e-46
CNTN6	-2.05329	-2.68666	-1.41992	8.25992e-49	2.48917e-46
DAP3	11.7831	8.14135	15.4248	8.24733e-49	2.48917e-46
ANLN	2.97864	1.9583	3.99898	8.63213e-49	2.56004e-46
THBD	-3.86003	-5.03764	-2.68242	9.21175e-49	2.68926e-46
RAI2	-5.63899	-7.53969	-3.7383	1.21596e-48	3.49524e-46
KIF2C	2.90323	1.97507	3.83139	1.53119e-48	4.33467e-46
ADH1B	-2.9665	-3.94256	-1.99044	1.61561e-48	4.39284e-46
ARHGAP6	-3.82429	-5.00665	-2.64193	1.61435e-48	4.39284e-46
ST6GALNAC6	-7.80159	-10.3374	-5.26573	1.62227e-48	4.39284e-46
OCIAD2	4.25708	2.93385	5.58032	1.64738e-48	4.39709e-46
FLAD1	8.88902	5.90917	11.8689	1.83069e-48	4.81756e-46
EFNA4	4.73394	3.22155	6.24634	2.02459e-48	5.25381e-46
PDIA4	5.71945	3.93845	7.50044	2.22135e-48	5.68545e-46
S1PR1	-3.57293	-4.64431	-2.50154	2.38709e-48	6.02708e-46
C10orf67	-2.02534	-2.58786	-1.46281	2.5274e-48	6.29626e-46
CDC20	2.62355	1.79213	3.45497	2.8661e-48	6.99484e-46
HJURP	2.5852	1.77575	3.39466	2.88269e-48	6.99484e-46
KL	-3.00478	-3.91676	-2.0928	3.35997e-48	8.04842e-46
RS1	-1.95209	-2.4952	-1.40898	4.15856e-48	9.83526e-46
CCDC48	-3.14265	-4.10623	-2.17908	4.56082e-48	1.06518e-45
HSPA12B	-3.52427	-4.5944	-2.45413	4.66388e-48	1.0758e-45
PTRF	-4.94161	-6.42012	-3.46309	6.78681e-48	1.5464e-45
TIMELESS	6.35898	4.41631	8.30165	7.01926e-48	1.58009e-45
NCKAP5	-2.08352	-2.67732	-1.48972	1.02026e-47	2.26936e-45
UPK3B	-1.66082	-2.14848	-1.17316	1.14094e-47	2.50793e-45
IGSF9	2.181	1.56846	2.79353	1.52214e-47	3.30693e-45
LDB2	-3.7468	-4.88425	-2.60935	1.65541e-47	3.55514e-45
ABCA8	-3.18801	-4.20543	-2.17058	1.71011e-47	3.63088e-45
GYPC	-6.04631	-7.93775	-4.15487	1.80126e-47	3.78144e-45
FAM83A	1.37093	0.991681	1.75019	2.37151e-47	4.92326e-45
CCNB1	4.05783	2.65115	5.4645	3.2415e-47	6.62078e-45
EXO1	2.67412	1.83478	3.51347	3.26007e-47	6.62078e-45
TCF21	-2.71368	-3.54547	-1.88189	3.52073e-47	7.07325e-45
SASH1	-5.02904	-6.66414	-3.39393	3.98576e-47	7.92234e-45
ACVRL1	-3.39687	-4.33703	-2.45671	4.7403e-47	9.32293e-45
DKC1	9.81358	6.58043	13.0467	5.00936e-47	9.74947e-45
PLK1	3.04199	2.10254	3.98143	5.54493e-47	1.06806e-44
ZWINT	3.88837	2.65305	5.12369	5.64553e-47	1.07634e-44
FGD5	-4.21676	-5.45369	-2.97984	5.99255e-47	1.10856e-44
RECQL4	3.95222	2.62532	5.27913	5.88165e-47	1.10856e-44
TBRG4	9.48269	6.66758	12.2978	5.98179e-47	1.10856e-44
UTP14A	12.6737	8.56363	16.7838	6.09275e-47	1.11605e-44
CCT3	8.35591	5.62181	11.09	6.78622e-47	1.23101e-44
JAM2	-4.00172	-5.25374	-2.74969	6.9626e-47	1.25086e-44
PAK1	6.45666	4.63077	8.28255	7.48454e-47	1.33182e-44
GMPPA	7.61275	5.52077	9.70472	7.72158e-47	1.36104e-44
SKA3	2.88333	1.97807	3.78859	7.80229e-47	1.36241e-44
CAT	-4.66957	-6.09179	-3.24735	7.93936e-47	1.37351e-44
C1orf131	8.89509	6.07045	11.7197	8.19524e-47	1.40477e-44
PLEK2	3.4559	2.40661	4.5052	8.44408e-47	1.42833e-44
TROAP	2.84857	1.90993	3.78722	8.48556e-47	1.42833e-44
TEK	-2.74177	-3.57141	-1.91214	9.27297e-47	1.54693e-44
KIF4A	2.55753	1.74149	3.37358	1.03538e-46	1.71195e-44
STX1A	3.83967	2.58201	5.09733	1.05934e-46	1.7362e-44
FMO2	-2.75984	-3.60265	-1.91703	1.14882e-46	1.86648e-44
KIF14	2.52962	1.77571	3.28354	1.28939e-46	2.07681e-44
TPX2	2.71002	1.84483	3.5752	1.39696e-46	2.23083e-44
ARHGAP31	-4.15243	-5.31264	-2.99222	1.41511e-46	2.24067e-44
AOC3	-3.52861	-4.58122	-2.476	1.48227e-46	2.32214e-44
STIL	3.74434	2.5532	4.93548	1.49142e-46	2.32214e-44
PAFAH1B3	5.00647	3.38645	6.62649	1.89214e-46	2.92172e-44
ROBO4	-3.05747	-3.94011	-2.17482	2.21327e-46	3.38957e-44
ANGPTL1	-3.13354	-4.11112	-2.15597	2.43764e-46	3.70284e-44
PTPRQ	-2.32508	-2.99742	-1.65274	2.53745e-46	3.82336e-44
DLGAP5	2.27907	1.57526	2.98287	2.65221e-46	3.96431e-44
ERCC6L	3.08095	2.13976	4.02214	2.76281e-46	4.09686e-44
STARD13	-4.88082	-6.38469	-3.37695	2.87476e-46	4.2293e-44
UBE2C	2.57081	1.70715	3.43448	3.06531e-46	4.4744e-44
EIF2AK1	12.5702	8.14494	16.9955	3.52834e-46	5.11035e-44
NPR1	-2.89429	-3.73024	-2.05835	3.57152e-46	5.1331e-44
ECSCR	-4.02156	-5.19248	-2.85063	3.85599e-46	5.49964e-44
GPT2	3.30261	2.30986	4.29535	4.56571e-46	6.46256e-44
BIRC5	2.65601	1.80143	3.51058	5.38747e-46	7.56839e-44
SLC25A39	8.96052	6.08952	11.8315	6.53233e-46	9.10821e-44
FOXF1	-3.05349	-3.95906	-2.14793	7.91403e-46	1.0953e-43
CDO1	-3.11117	-4.0881	-2.13423	8.0495e-46	1.10586e-43
MELK	2.37363	1.65677	3.09049	9.1353e-46	1.24359e-43
MYOC	-1.56956	-2.00381	-1.13532	9.18519e-46	1.24359e-43
GLIPR2	-4.43588	-5.72149	-3.15026	1.05114e-45	1.41291e-43
EMCN	-3.20029	-4.19413	-2.20646	1.18722e-45	1.58444e-43
CLIC5	-2.03084	-2.6036	-1.45808	1.21192e-45	1.60592e-43
RTKN2	-1.63116	-2.07597	-1.18634	1.226e-45	1.61314e-43
NUF2	2.36812	1.63399	3.10225	1.59356e-45	2.0821e-43
MSTO1	6.16573	4.33777	7.99368	1.61973e-45	2.10159e-43
CLDN5	-2.73709	-3.51478	-1.95941	1.68986e-45	2.17747e-43
TMEM88	-3.0941	-3.96988	-2.21833	1.87099e-45	2.39435e-43
LTBP4	-3.34333	-4.29537	-2.39129	1.8915e-45	2.3969e-43
TNS1	-3.76688	-4.86528	-2.66848	1.91146e-45	2.3969e-43
WDR12	7.80842	5.35876	10.2581	1.90343e-45	2.3969e-43
B3GNT3	1.5261	1.11029	1.94191	1.97108e-45	2.45517e-43
TMEM177	5.28363	3.74917	6.8181	1.99928e-45	2.47381e-43
CCNB2	2.91748	1.98808	3.84687	2.02273e-45	2.48637e-43
CDH5	-3.28566	-4.23771	-2.33362	2.12107e-45	2.5902e-43
ANGPT4	-2.07194	-2.63824	-1.50564	2.1656e-45	2.6274e-43
EZH2	4.09882	2.80496	5.39268	2.22538e-45	2.68251e-43
C2orf29	8.08252	5.55543	10.6096	2.35634e-45	2.82217e-43
GAS6	-5.43636	-7.0917	-3.78102	2.44286e-45	2.90716e-43
TACC1	-4.95437	-6.39651	-3.51223	2.8074e-45	3.31984e-43
RAMP3	-2.47026	-3.16079	-1.77973	2.91862e-45	3.42965e-43
MMP11	1.3771	0.996398	1.75779	2.96319e-45	3.45797e-43
NLN	4.70955	3.33998	6.07911	2.97973e-45	3.45797e-43
WNT3A	-1.53857	-1.94683	-1.1303	3.04081e-45	3.50707e-43
SRD5A1	4.93014	3.47617	6.38412	3.54617e-45	4.06483e-43
ASPM	2.28207	1.62412	2.94001	3.68035e-45	4.1929e-43
C13orf15	-2.7295	-3.4807	-1.9783	3.94321e-45	4.46515e-43
SFXN4	6.58821	4.68831	8.48811	4.14853e-45	4.66935e-43
TRAP1	7.59519	5.40158	9.7888	4.33048e-45	4.84495e-43
GGCT	6.57805	4.51699	8.63911	4.65232e-45	5.17405e-43
XDH	1.77964	1.27489	2.28439	5.22542e-45	5.77702e-43
GRIA1	-1.89795	-2.48255	-1.31334	5.45657e-45	5.96203e-43
NECAB1	-2.32748	-2.95706	-1.6979	5.43366e-45	5.96203e-43
TTK	2.548	1.79219	3.3038	5.78676e-45	6.28603e-43
ALG8	10.7428	7.38779	14.0978	5.9562e-45	6.43269e-43
SHMT2	7.09269	4.92615	9.25923	6.22736e-45	6.68689e-43
C1orf112	7.49161	5.0415	9.94173	6.27389e-45	6.69836e-43
CSTF2	7.07648	4.91302	9.23994	6.90625e-45	7.33161e-43
C20orf160	-3.14614	-4.06902	-2.22327	6.98486e-45	7.37317e-43
MAMDC2	-2.91282	-3.83021	-1.99543	7.05693e-45	7.40739e-43
FRMD3	-3.22374	-4.15805	-2.28943	7.69641e-45	7.98888e-43
KIF18B	2.44983	1.67954	3.22012	7.65496e-45	7.98888e-43
TMEM184A	2.74327	1.98922	3.49732	8.03352e-45	8.29273e-43
PLAC9	-2.83903	-3.68076	-1.9973	8.20312e-45	8.42127e-43
FAM150B	-2.12272	-2.73431	-1.51113	8.58806e-45	8.76826e-43
XPO5	8.57417	5.9209	11.2274	8.86278e-45	8.99957e-43
DENND3	-4.81019	-6.30438	-3.31599	1.08584e-44	1.09664e-42
PID1	-4.14698	-5.38452	-2.90945	1.31493e-44	1.32086e-42
MND1	2.276	1.62071	2.93129	1.59011e-44	1.58875e-42
ECE2	4.44393	3.08868	5.79919	1.60672e-44	1.5968e-42
CD36	-2.26259	-2.89082	-1.63436	1.70279e-44	1.68333e-42
ADPRH	-6.13045	-7.87159	-4.3893	1.8278e-44	1.7974e-42
FOXM1	3.04081	2.1122	3.96942	2.00696e-44	1.96325e-42
PRC1	4.03335	2.79313	5.27357	2.04864e-44	1.99359e-42
NUSAP1	3.22084	2.2393	4.20237	2.16282e-44	2.09379e-42
CDC6	2.81325	1.92939	3.69712	2.44311e-44	2.35294e-42
CD5L	-1.78651	-2.22896	-1.34406	2.48835e-44	2.38422e-42
DEPDC1B	2.26259	1.58242	2.94277	2.57842e-44	2.45792e-42
E2F8	2.19025	1.57401	2.80648	2.69646e-44	2.55739e-42
GYPE	-2.19501	-2.785	-1.60501	2.91509e-44	2.75078e-42
MANF	6.21692	4.4576	7.97623	3.22784e-44	3.0306e-42
ST14	5.658	3.96351	7.35249	4.11449e-44	3.84375e-42
NXPH3	-2.91067	-3.73916	-2.08219	4.39234e-44	4.08291e-42
C16orf75	3.84027	2.62591	5.05462	4.48851e-44	4.15165e-42
CFD	-2.81283	-3.64884	-1.97682	4.71625e-44	4.34081e-42
ADM2	2.07395	1.51439	2.63351	4.75844e-44	4.35818e-42
WASF3	-4.11096	-5.39274	-2.82918	5.58171e-44	5.08725e-42
SH2D3C	-3.44078	-4.42119	-2.46037	8.23184e-44	7.4662e-42
GALNT7	4.73016	3.37456	6.08577	8.27405e-44	7.46823e-42
FUT2	2.08199	1.51355	2.65044	9.26758e-44	8.28495e-42
PDZD2	-2.88231	-3.68409	-2.08053	9.26608e-44	8.28495e-42
GINS1	2.84882	2.01579	3.68185	9.3326e-44	8.29888e-42
SGEF	-2.50242	-3.17473	-1.83011	9.37199e-44	8.29888e-42
KCNT2	-2.71445	-3.49073	-1.93817	9.46656e-44	8.34308e-42
AURKB	2.27891	1.60606	2.95175	9.70979e-44	8.51726e-42
MYBL2	1.88758	1.32305	2.45211	9.85173e-44	8.60139e-42
RRM2	2.46238	1.70539	3.21937	1.00095e-43	8.69849e-42
GTSE1	2.49243	1.76039	3.22447	1.03296e-43	8.93509e-42
LOC100131726	2.4173	1.56976	3.26484	1.09221e-43	9.4041e-42
KIF26B	1.97376	1.44706	2.50045	1.1401e-43	9.77141e-42
ATP10B	2.51744	1.73864	3.29625	1.16871e-43	9.97088e-42
KIF1C	-5.18269	-6.51117	-3.85421	1.22555e-43	1.04082e-41
CEP55	2.58121	1.79698	3.36545	1.27605e-43	1.07395e-41
NFKBIL2	4.77023	3.22496	6.3155	1.27196e-43	1.07395e-41
FIGF	-1.97548	-2.55732	-1.39364	1.39225e-43	1.16649e-41
NARF	7.993	5.58567	10.4003	1.40168e-43	1.16915e-41
KIF11	3.03352	2.13457	3.93247	1.54879e-43	1.28611e-41
C12orf32	8.15857	5.68316	10.634	1.67467e-43	1.3845e-41
HSPB8	-3.53372	-4.53302	-2.53441	1.75111e-43	1.44131e-41
KANK2	-4.34125	-5.55601	-3.12649	1.91298e-43	1.56079e-41
P4HB	7.18295	5.12787	9.23803	1.91287e-43	1.56079e-41
SERINC2	3.87968	2.72895	5.0304	1.94106e-43	1.57682e-41
NCAPH	2.5581	1.80733	3.30886	2.32571e-43	1.88111e-41
CBX7	-4.7041	-6.08502	-3.32317	2.36425e-43	1.90404e-41
TGFBR3	-2.95112	-3.84316	-2.05909	2.50719e-43	2.01049e-41
MKI67	2.4414	1.71329	3.16951	2.72557e-43	2.17626e-41
SCN4B	-2.50055	-3.21646	-1.78464	2.77146e-43	2.20348e-41
SLC25A13	8.26474	5.6877	10.8418	2.87828e-43	2.27872e-41
GPX3	-2.88548	-3.7191	-2.05187	3.5263e-43	2.77998e-41
CA4	-1.25629	-1.6079	-0.904686	3.59855e-43	2.82501e-41
PRKCE	-3.67665	-4.68399	-2.6693	3.66598e-43	2.86591e-41
NEK2	2.13891	1.47392	2.80389	3.73162e-43	2.90507e-41
PPAT	4.47838	3.14397	5.8128	3.91161e-43	3.03255e-41
SFXN1	5.13378	3.66952	6.59804	4.08524e-43	3.15408e-41
GRASP	-2.97848	-3.81011	-2.14685	4.22118e-43	3.24562e-41
CCNE1	2.53918	1.81112	3.26724	4.29186e-43	3.28014e-41
PLEKHN1	2.09357	1.53397	2.65317	4.30119e-43	3.28014e-41
CYBRD1	-3.79298	-4.87209	-2.71386	4.57054e-43	3.47138e-41
FANCI	6.50005	4.33727	8.66283	5.11716e-43	3.8552e-41
TGFBR2	-4.92154	-6.32356	-3.51952	5.09946e-43	3.8552e-41
CLEC14A	-3.04156	-3.85425	-2.22887	5.72933e-43	4.29907e-41
NAT10	10.4836	7.43464	13.5326	5.8866e-43	4.39941e-41
PRX	-1.89228	-2.4015	-1.38306	6.2875e-43	4.6803e-41
DNAJA3	9.07578	6.5393	11.6123	7.68485e-43	5.69777e-41
SLC5A6	8.79836	6.114	11.4827	8.0442e-43	5.94062e-41
STOM	-6.65491	-8.69964	-4.61018	8.20281e-43	6.03391e-41
CPSF3	10.2131	7.1473	13.2789	8.56107e-43	6.27275e-41
CDCA3	2.8117	1.96647	3.65693	8.63988e-43	6.30576e-41
FAM46B	-2.67719	-3.44709	-1.90729	8.72051e-43	6.33985e-41
DEPDC1	1.94268	1.39892	2.48644	1.17368e-42	8.49963e-41
CGNL1	-2.83768	-3.57939	-2.09598	1.1791e-42	8.50593e-41
FHL5	-2.68489	-3.45001	-1.91978	1.27171e-42	9.13872e-41
MGAT3	-1.9844	-2.54537	-1.42343	1.28084e-42	9.16907e-41
ARHGEF15	-3.1032	-3.97079	-2.2356	1.40038e-42	9.95682e-41
GALNTL4	-4.4963	-5.75999	-3.2326	1.40154e-42	9.95682e-41
DPH2	7.50842	5.43874	9.57811	1.44143e-42	1.02014e-40
TARS2	8.12504	5.60581	10.6443	1.51779e-42	1.07013e-40
LOC158376	-2.48945	-3.13038	-1.84852	1.61286e-42	1.13288e-40
HIGD1B	-2.57576	-3.2991	-1.85241	1.62409e-42	1.1365e-40
ARRB1	-4.50728	-5.71357	-3.30099	1.72045e-42	1.19943e-40
ORC6L	3.31953	2.35078	4.28828	1.76503e-42	1.22594e-40
SLC39A11	5.10038	3.66763	6.53313	2.16136e-42	1.49566e-40
ABI3BP	-2.95366	-3.82733	-2.07998	2.28131e-42	1.57284e-40
TMPRSS4	1.14994	0.838907	1.46097	2.32376e-42	1.59622e-40
NDC80	2.39016	1.65547	3.12484	2.61604e-42	1.79041e-40
EARS2	9.18383	6.45099	11.9167	2.64555e-42	1.804e-40
NEIL3	2.28998	1.66174	2.91823	2.71519e-42	1.84475e-40
CYYR1	-3.29732	-4.19801	-2.39663	2.88135e-42	1.95055e-40
CKAP2L	2.29457	1.61774	2.97139	2.96779e-42	2.00181e-40
CCNF	4.32846	2.95027	5.70665	3.08293e-42	2.072e-40
ACTN2	-2.25986	-2.87957	-1.64015	3.69308e-42	2.47317e-40
RAPGEF4	-3.8704	-5.02705	-2.71374	4.17251e-42	2.78426e-40
CHD1L	8.95032	6.26394	11.6367	4.20408e-42	2.79534e-40
MYCT1	-3.16092	-4.00148	-2.32035	4.38571e-42	2.90577e-40
PNPLA6	-5.18544	-6.66536	-3.70551	4.49951e-42	2.97063e-40
C1orf74	5.6915	3.9389	7.4441	4.57889e-42	3.01239e-40
SERINC1	-7.11321	-9.06603	-5.16039	4.73013e-42	3.10097e-40
SPP1	1.11362	0.818678	1.40857	5.28897e-42	3.45521e-40
STARD8	-3.77349	-4.86455	-2.68242	5.45253e-42	3.54966e-40
PSAT1	2.33318	1.65359	3.01278	5.81168e-42	3.77033e-40
CD300LG	-1.41326	-1.78986	-1.03667	6.20778e-42	4.01336e-40
CFL2	-4.73376	-6.02074	-3.44677	6.86789e-42	4.42481e-40
ANGPTL7	-1.53208	-1.897	-1.16715	7.55937e-42	4.85358e-40
HMGA1	3.58339	2.60186	4.56492	7.78792e-42	4.9832e-40
LYVE1	-2.13842	-2.72904	-1.54781	7.95982e-42	5.07581e-40
FXYD6	-4.19891	-5.42002	-2.97779	8.02941e-42	5.10277e-40
SYNPO	-4.62063	-5.95791	-3.28335	8.25681e-42	5.2295e-40
HM13	7.07911	5.13727	9.02095	8.55938e-42	5.40282e-40
MCM4	4.20967	2.93049	5.48885	8.62729e-42	5.42735e-40
FARSB	8.61015	6.07377	11.1465	8.76667e-42	5.49652e-40
MASP1	-2.12932	-2.72033	-1.53831	9.11265e-42	5.69434e-40
FAM111B	2.42557	1.71839	3.13276	9.48793e-42	5.90908e-40
